# Supplementary material for: Transcriptomic Analyses during the Transition from Biomass Production to Lipid Accumulation in the Oleaginous Yeast Yarrowia lipolytica
Source: PLoS One. 2011 Nov 22;6(11):e27966. doi: 10.1371/journal.pone.0027966 (PMC3222671; doi:10.1371/journal.pone.0027966)
Supplement: Table S1 — Growth conditions, composition of the fed-batch medium, salts and vitamins stock solutions. (DOC) [file pone.0027966.s001.doc]

**Supplementary Table S1 : Growth conditions, composition of the fed-batch medium, salts and vitamins stock solutions.** Axenic cultures were carried out in rich medium (lysogeny broth, LB) containing 10 g.l-1 glucose. Cells were cultured in flasks, with shaking, and harvested before the stationary growth phase. Sterile glycerol was added (30 % v/v) to 1 ml aliquots in sterile vials, which were frozen and stored at – 80 °C. These frozen stock cultures were used to inoculate the fed batch culture. Inoculum was prepared as follows: a preliminary batch culture was performed in a 100 ml baffled Erlenmeyer flask containing 8 ml of LB (30 °C, 16 h, shaking at 100 rpm). The culture medium was transferred to a 250 ml baffled Erlenmeyer flask containing 72 ml of mineral medium, with 0.1% (v/v) vitamin solution and 10 g.l–1 glucose, and incubated for 12 h at 30 °C. The composition of preculture and culture media and solutions (see table below) were defined as described by Egli and Fiechter [1]. The resulting 80 ml culture was used to inoculate a 5 l Erlenmeyer flask containing 720 ml of mineral medium with 0.1% (v/v) vitamin solution, which was then incubated at 30°C for 12 h. This culture was used to inoculate 7.2 l of mineral medium directly in the bioreactor. The bioreactor was supplied with a constant ratio of mineral medium to substrate of 1:10. The composition of the mineral medium input is described in supplementary Table S1. Vitamin solution was added during biomass growth, with 10 ml of vitamin solution added for every 10 gCDW.l-1 of newly formed biomass [2]. Vitamins were at least 99.9% pure and were obtained from Sigma-Aldrich (Sigma-Aldrich Chimie SARL, France). Glucose was provided by Roquette (France). All other chemicals (*e.g.* mineral medium, solvent, mobile phases) were at least 99% pure and were purchased from VWR (France).

1. Egli T, Fiechter A (1981) Theoretical Analysis of Media Used in the Growth of Yeasts on Methanol. Microbiol 123: 365-369.

2. Alfenore S, Molina-Jouve C, Guillouet SE, Uribelarrea J-L, Goma G, Benbadis L (2002) Improving ethanol production and viability of *Saccharomyces cerevisiae* by a vitamin feeding strategy during fed-batch process. Appl Microbiol Biotechnol 60: 67-72.

| **Solution** | **Component** | **Concentration (g.L-1)** |
| --- | --- | --- |
| Preculture and Starting medium | K2HPO4 | 3.0 |
|  | NaH2PO4 ; H2O | 3.0 |
|  | (NH4)2SO4 | 3.0 |
|  | MgSO4·; 7H2O | 1.0 |
|  | ZnSO4·; 7H2O | 0.0 |
|  | FeSO4·; 7H2O | 0.016 |
|  | MnSO4·; H2O | 0.0038 |
|  | CoCl2·; 6H2O | 0.0005 |
|  | CuSO4·; 5H2O | 0.0009 |
|  | Na2MoO4·; 2H2O | 0 |
|  | CaCl2·; 2H2O | 0.023 |
|  | H3BO3 | 0.003 |
| Mineral solution | KCl | 20.0 |
|  | NaCl | 20.0 |
|  | MgSO4 ;·7H2O | 27.0 |
|  | ZnSO4·; 7H2O | 7.71 |
|  | MnSO4·; H2O | 0.47 |
|  | CoCl2·; 6H2O | 0.3 |
|  | CuSO4·; 5H2O | 0.6 |
|  | Na2MoSO4·; 2H2O | 0.094 |
|  | CaCl2·; 2H2O | 6.4 |
|  | FeSO4·; 7H2O | 3.97 |
|  | H3BO3 | 0.3 |
|  | H3PO4 | 125.0 |
| Vitamin solution | d-Biotine | 0.1 |
|  | Panthotenate | 1.0 |
|  | Nicotinic acid | 1.0 |
|  | Hydrochloride thiamine | 1.0 |
|  | P-amino-benzoic acid | 0.2 |
|  | Hydrochlorid pyridoxol | 1.0 |
|  | Myoinositol | 25.0 |
